1 **High-throughput cellular-resolution synaptic connectivity mapping *in***  
2 ***vivo* with concurrent two-photon optogenetics and volumetric Ca<sup>2+</sup>**  
3 **imaging**

4

5 Christopher McRaven<sup>1\*</sup>, Dimitrii Tanese<sup>2\*</sup>, Lixia Zhang<sup>1\*</sup>, Chao-Tsung Yang<sup>1</sup>, Misha B. Ahrens<sup>1</sup>,  
6 Valentina Emiliani<sup>2</sup>, Minoru Koyama<sup>1§</sup>

7

1. Janelia Research Campus, HHMI, Ashburn VA 20147, USA

8

2. Institut de la Vision, Sorbonne University, Inserm S968, CNRS UMR7210, 17 Rue Moreau,

9

75012, Paris, France

10

\* These authors contributed equally to this work.

11

§ Corresponding author

12

Figures: 2

13

Supplementary Figures: 5

14

15 Correspondence:

16 Minoru Koyama

17 Janelia Research Campus, HHMI

18 19700 Helix Drive,

19 Ashburn, VA 20147

20 [minoru.koyama@gmail.com](mailto:minoru.koyama@gmail.com)

## 21 **Abstract**

22 The ability to measure synaptic connectivity and properties is essential for understanding of neuronal  
23 circuits. However, the existing methods that allow such measurements at cellular resolution are laborious  
24 and technically demanding. Here we describe a system that allows such measurements in a high-  
25 throughput way by combining concurrent two-photon optogenetics and volumetric Ca<sup>2+</sup> imaging with  
26 whole-cell recording, and reveal in zebrafish a circuit motif for generating fast undulatory locomotion.

## 27 **Main**

28 Synapses conduct electrical signals between neurons and allow them to form circuits that ultimately  
29 control animal behavior. Thus, the ability to map synaptic connectivity and synaptic properties is essential  
30 for understanding circuit operations underlying animal behavior. Electrical signals through synapses and  
31 their dynamics can be directly measured with electrophysiological techniques such as paired whole-cell  
32 recordings. However, these techniques are hard to scale up and the yield is often low, especially *in vivo*.  
33 The development of optogenetics enabled optical control of neuronal activity and has been used to assess  
34 macroscopic synaptic connectivity wherein a group of neurons is activated and their synaptic responses in  
35 another neurons are monitored via whole-cell recordings<sup>1</sup>, the next step is now to transition from this  
36 macroscopic approach into a microscopic synaptic connectivity mapping. This requires performing high  
37 throughput (10s of pairs) optogenetic activation of presynaptic cells with single cell resolution while  
38 monitoring the photoevoked activity of the presynaptic cell. The combination of two-photon shaped  
39 stimulation and the engineering of efficient soma-targeted opsins, called circuits optogenetics<sup>2</sup>, opened a  
40 way to stimulate single and multiple neurons at near single-cell resolution<sup>3-5</sup>. Yet, the effectiveness of this  
41 approach for synaptic connectivity mapping has been only demonstrated in proof-of-principle  
42 experiments over relatively small neuronal population in brain slices<sup>3,5</sup> and has not been exploited for  
43 large-scale synaptic connectivity mapping *in vivo*. Furthermore, potential 3D off-target activations and  
44 cross talk excitation of the opsins from the imaging laser have never been rigorously assessed for such  
45 connectivity analyses.

46 Here we present a concurrent two-photon optogenetic stimulation and volumetric Ca<sup>2+</sup> imaging system for  
47 zebrafish that allows to induce and monitor single-cell activation in 3D and reconstruct cellular-resolution  
48 synaptic property maps in a large volume *in vivo*, which is prohibitively difficult to accomplish with  
49 traditional techniques (Fig. 1ai). We examine long-range synaptic connectivity of genetically defined  
50 spinal interneurons and reveal a circuit motif that may underlie fast undulatory movements during rapid  
51 forward locomotion. To our knowledge, this is the first demonstration of high-throughput physiological

52 measurements of synaptic properties at single-cell resolution *in vivo* that provides insight to circuit  
53 operation in the nervous system.

54 For our study, we chose the high-photocurrent channelrhodopsin CoChR<sup>6</sup> based on previous successful  
55 demonstrations of two-photon cellular stimulation with this opsin<sup>5,7</sup>. To monitor activated neurons by  
56 Ca<sup>2+</sup> imaging, we chose a genetic red Ca<sup>2+</sup> indicator, jRGECO1b, which has been successfully used in  
57 zebrafish<sup>8</sup>. This indicator allowed the imaging of Ca<sup>2+</sup> response at the wavelength that minimizes the  
58 imaging-induced activation of CoChR (Fig. 1a ii; Supplementary Fig. 1) and was sensitive enough to  
59 detect single action potentials in zebrafish sensory neurons (Supplementary Fig. 2). For two-photon  
60 activation of CoChR, we set up a two-photon patterned illumination system based on computer generated  
61 holography<sup>5</sup> that allows the generation of photostimulation spots in arbitrary locations in 3D. We  
62 achieved axial resolution of 12 μm for a 6 μm-diameter spot of illumination (Supplementary Fig. 3),  
63 which is appropriate for single-cell stimulation of zebrafish neurons whose average diameter is 6.6 μm<sup>9</sup>.  
64 To perform concurrent volumetric jRGECO1b imaging, we implemented a remote-focusing system based  
65 on a remote movable mirror that is translated by a voice coil motor<sup>10</sup>. This technique enables us to change  
66 the imaging-plane without moving the objective lens, thus makes it possible to perform volumetric  
67 imaging without changing the axial position of photostimulation spots (Fig. 1 aiii). This system achieves  
68 axial resolution of less than 4.5 μm within the axial scanning range of 140 μm which is enough to obtain  
69 two-photon imaging at cellular resolution (Supplementary Fig. 4).

70 To reach cellular resolution for opsin stimulation, we fused CoChR with the soma-localization sequence  
71 from the mammalian potassium channel Kv2.1<sup>3</sup> to target its expression to cell bodies. We then generated  
72 two UAS transgenic lines: one that expresses CoChR fused with the Kv2.1 sequence (hereafter referred as  
73 CoChR-EGFP-Kv2.1), and one that expresses jRGECO1b (Fig. 1b) to take advantage of stronger but  
74 sparser expression one can attain with the Gal4/UAS system. Using these optical setups and transgenic  
75 lines, we examined the amount of imaging-induced activation of CoChR in a practical experimental  
76 condition in hindbrain neurons (Fig. 1c). To monitor subthreshold activation of CoChR during the

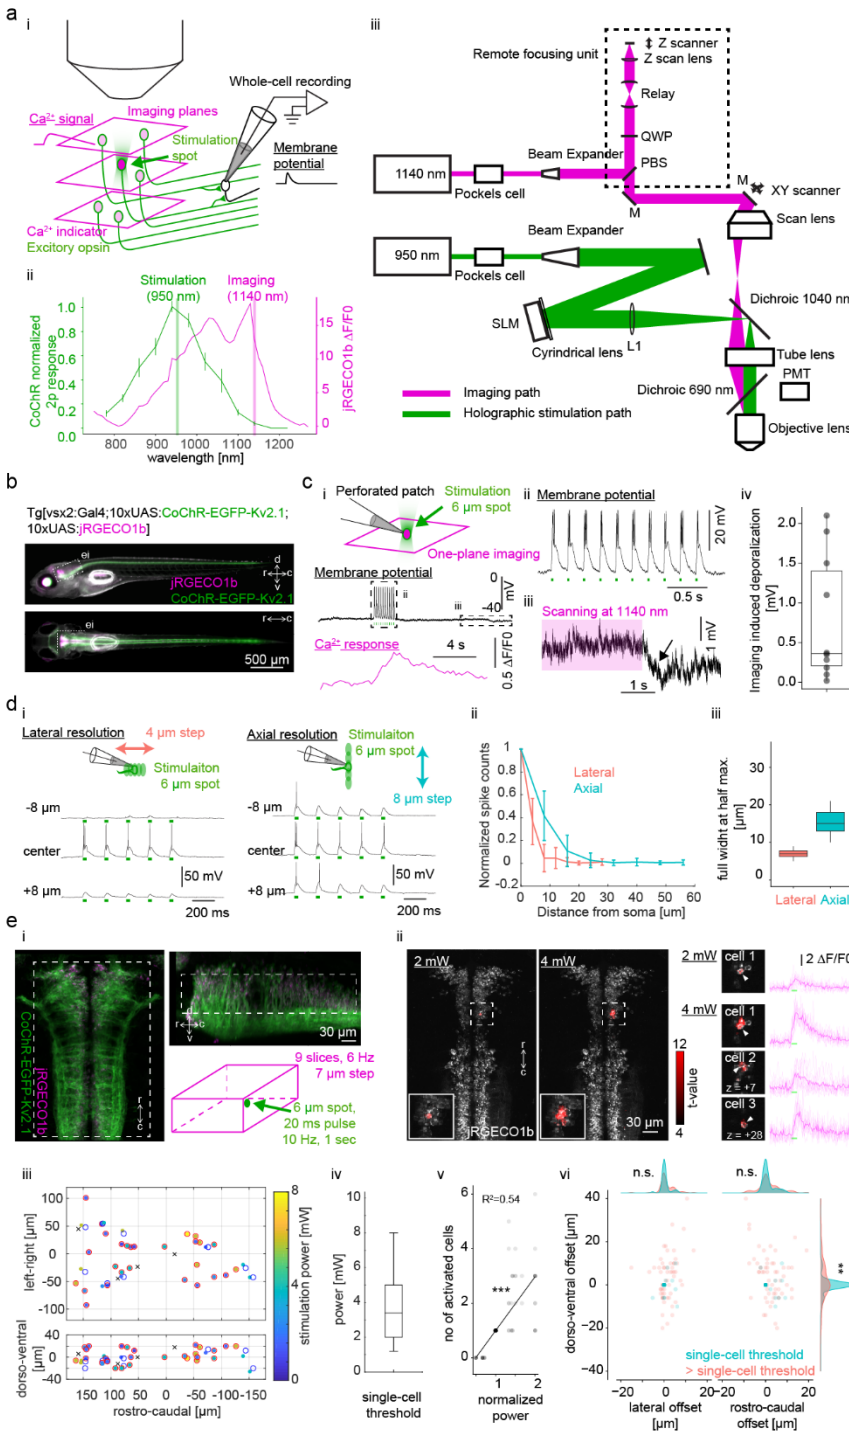

**Figure 1. Concurrent two-photon optogenetics and volumetric  $\text{Ca}^{2+}$  imaging for high-throughput synaptic connectivity mapping.**

a. (i) A schematic of the high-throughput cellular synaptic connectivity mapping using two-photon optogenetics and volumetric imaging. A genetically defined cell group is co-labeled with  $\text{Ca}^{2+}$  indicator (magenta) and excitatory opsin (green). Multiplane imaging is used to monitor the 3D distribution of the photo-evoked activation. Postsynaptic potential is monitored in a cell of interest by whole-cell recording. (ii) Normalized response of two-photon-induced activation of CoChR (left y-axis, green) and  $\Delta F/F_0$  of jRGECO1b (right y-axis, magenta) as a function of wavelength. Excitation wavelength for photostimulation (950 nm) was chosen based on the normalized curve. To minimize imaging-induced activation of opsin-expressing neurons and reach high  $\text{Ca}^{2+}$  sensitivity, imaging was done at 1140 nm. (iii) Optical setup for simultaneous volumetric imaging and single-cell stimulation. The stimulation path is shown in green. The imaging path is shown in magenta. The remote focusing unit is highlighted with a dotted rectangle. PBS, polarizing beam splitter; QWP, quarter wave plate; SLM, spatial light modulator; PMT, photomultiplier tube; M, mirror. b. A transgenic zebrafish expressing CoChR-EGFP-Kv2.1 (green) and jRGECO1b (magenta) in V2a neurons in the side view (top) and the dorsal view (bottom). d, dorsal; v, ventral; r, rostral; c, caudal. The dotted white rectangle indicates the region shown in the panel e. c. (i) Experimental setup for assessing imaging-induced activation of opsin-expressing cells. Hindbrain V2a were co-labeled with CoChR-EGFP-Kv2.1 and jRGECO1b and their membrane potentials were

monitored by perforated patch recordings. The patched cell was stimulated by two-photon holographic illumination.  $\text{Ca}^{2+}$  response was monitored by jRGECO1b imaging. An example trace of membrane potential (top, black trace), stimulation pulses (green dots, 2 mW, 20 ms, 5 Hz), and  $\text{Ca}^{2+}$  response (bottom, magenta). (ii) A close up view of the action potentials induced by stimulation pulses. (iii) Imaging-induced depolarization. The duration of the imaging is shown with the magenta rectangle. An arrow highlights the repolarization after the end of the imaging scan. (iv) Imaging-induced depolarization in the neurons that elicited action potentials in response to stimulation ( $n = 10$  cells). d. Physiological measurement of spatial resolution of holographic stimulation in neurons expressing CoChR-EGFP-Kv2.1. (i) Whole-cell recordings were performed in hindbrain V2a neurons expressing CoChR-Kv2.1. Lateral resolution was examined by scanning the 6  $\mu\text{m}$  diameter stimulation spot laterally by moving the sample in 4  $\mu\text{m}$  step (left). A train of stimulation pulses (20 ms, 5 Hz) were delivered to induce spiking activity. The stimulation power was chosen to elicit reliable spiking across trials (4 mW). Axial resolution was similarly examined by moving the objective lens axially in 8  $\mu\text{m}$  step (right). (ii) Normalized stimulation-induced spike counts as a function of

from soma in lateral direction (orange,  $n = 14$  cells) and in axial direction (cyan,  $n = 13$  cells). (iii) Distribution of lateral and axial resolution (lateral,  $n = 14$  cells; axial,  $n = 13$  cells). Spatial resolution is defined as the full width at half maximum of the stimulation induced spike counts. **e.** Assessment of single-cell stimulation with volumetric jRGECO1b imaging. (i) The region of the hindbrain used for this experiment is indicated by a dotted white rectangle in the dorsal view (left) and the side view (top right). CoChR-EGFP-Kv2.1, green; jRGECO1b, magenta. Nine optical planes were acquired at 7- $\mu\text{m}$  step at 6 Hz (bottom right, magenta cube). A 6- $\mu\text{m}$  spot two-photon illumination was delivered in a 1-sec train of 20 ms pulses at 10 Hz (green). (ii) Examples of stimulations at the power just enough to activate the target cell (2 mW) and at the power that led to the activation of off-target cells (4 mW). Activated cells detected by regression analysis (see Methods) are shown in red based on their  $t$ -values on top of the jRGECO1b volume. The activated cells and their jRGECO1b timecourses were shown on the right (thick magenta line, average response; thin magenta lines, individual responses). Z value indicates the offset in the axial direction in  $\mu\text{m}$  from the target cell. (iii) Spatial distribution of the targeted hindbrain V2a neurons (40 targets from 4 fish) and the activated cells at the condition that led to single-cell activation (36 targets). Red open circles indicate the targets with successful single-cell on-target activation (27 targets). Blue open circles indicate the targets with successful single-cell but off-target activation (9 targets). Black crosses indicate the targets with no successful single-cell activation (4 targets). The activated cells for successful single-cell activation are indicated by filled circles with their color coding the stimulation power. (iv) Stimulation power used for single-cell stimulation ( $n = 36$  targets). (v) Number of activated cells as a function of the normalized power (normalized to the power used for single-cell stimulation for each target) ( $n = 36$  targets). The data was fitted with a linear regression (black line). The regression coefficient was statistically significant ( $P = 2.6\text{e-}17$ ). (vi) The location of activated cells relative to the target cell at the power for single-cell stimulation (cyan) and at the power just above the power for single-cell stimulation (orange) ( $n = 36$  targets). The distribution changed significantly in the dorso-ventral axis (Kolmogorov-Smirnov test,  $P = 9.6\text{e-}3$ ).

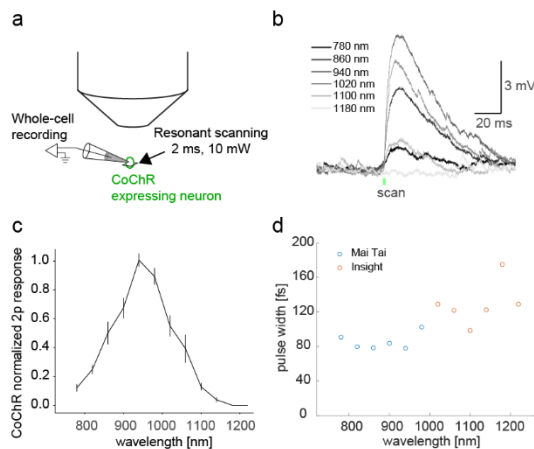

### Supplementary Figure 1. Wavelength-dependent two-photon activation of CoChR-expressing neurons

**a.** Experimental setup. Subthreshold response in a hindbrain V2a neuron expressing CoChR was monitored by whole-cell recording. The recorded cell was stimulated by resonant raster scanning of femtosecond laser over the cell body (2 ms, 10 mW). **b.** Example traces of subthreshold response from 780 nm to 1180 nm. The timing of the stimulation scanning is indicated by a green dot. **c.** Normalized response amplitude as a function of wavelength ( $n = 10$  cells). **d.** Pulse widths of femtosecond laser as a function of wavelength. Measurement from two different laser sources are combined (blue, Mai Tai; red, Insight).

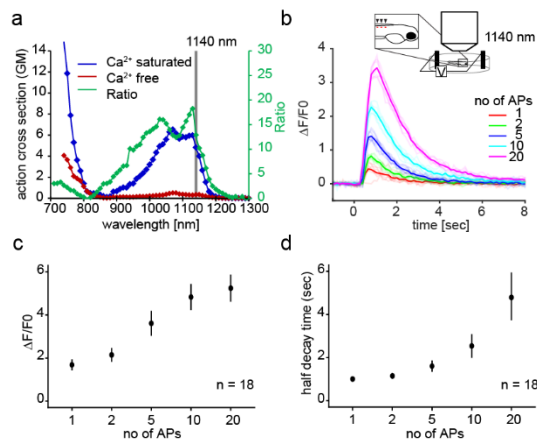

### Supplementary Figure 2. Sensitivity of jRGECO1b in zebrafish spinal sensory neurons

**a.** Two-photon action cross section of jRGECO1b in  $\text{Ca}^{2+}$ -free (blue line) and  $\text{Ca}^{2+}$ -saturated (red line) states. Green line shows the ratio between the two states. **b.** Two-photon imaging of zebrafish Rohon-Beard cells expressing jRGECO1b at 1140 nm. Example traces of jRGECO1b  $\text{Ca}^{2+}$  response to action potentials elicited by electrical shocks (50 Hz). **c.** Fluorescence fold change of jRGECO1b as a function of number of action potentials (APs). **d.** Half decay time of jRGECO1b as a function of number of action potentials (APs).

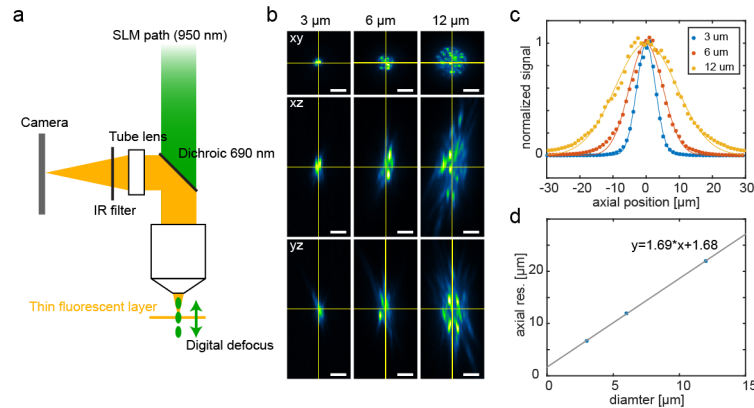

### Supplementary Figure 3. Axial profile of two-photon holographic stimulation

**a.** Experimental setup for characterizing axial resolution of two-photon holographic beam. A cover glass with a thin layer of fluorescent dye is brought to the focal plane of the objective lens. A holographic spot of a given diameter is digitally focused at different depths while imaging the resulting fluorescence at the focal plane of the objective lens with a camera. **b.** Cross sections of holographic spots with variable diameters (3, 6 and 12  $\mu\text{m}$ ). **c.** Axial profiles of the variably sized holographic spots (3, 6 and 12  $\mu\text{m}$ ). Normalized integrated fluorescent signal is plotted as a function of axial position. **d.** Axial resolution as a function of spot diameter, showing a linear relationship between them.

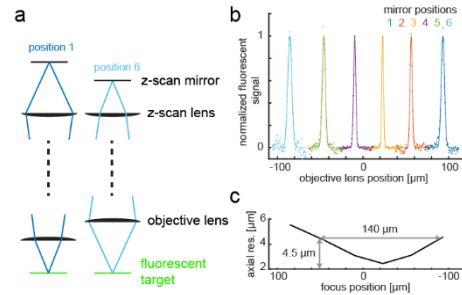

### Supplementary Figure 4. Axial resolution of the remote focusing system

**a.** Experimental procedure. Z-scan mirror was positioned by a voice coil to change the focus of the scanning beam (dark blue, position 1; cyan, position 6). For each mirror position, we scan the objective lens axially and monitor the fluorescent signal from the fluorescent target (green) to characterize the axial extent of the point spread function (PSF). **b.** Normalized fluorescent signal as a function of objective lens position. Signal profiles were plotted separately for each mirror position (1 to 6). Zero in the x-axis (“objective lens position”) is defined as the position where the fluorescent target is in focus when the remote focusing unit is bypassed. **c.** Axial extent of the PSF as a function of the focus position. Axial extent is defined as full width at half maximum of the normalized fluorescent signal. Note that axial resolution stays below 4.5  $\mu\text{m}$  for 140- $\mu\text{m}$  axial scanning range.

77 imaging of jRGECO1b expressed in cytosol, we used perforated patch recording so as to retain  
 78 jRGECO1b in the cytosol while recording. For this analysis, we only included neurons with high CoChR  
 79 expression that exhibited reliable action potentials in response to stimulation pulses (Fig. 1c i,ii) and used  
 80 single-plane imaging with high enough imaging power (6.5 mW) to reliably detect the fluorescent  
 81 increase of jRGECO1b (Fig. 1ci). As a given neuron is scanned more frequently with single-plane  
 82 imaging, this test provides an upper estimate of the imaging artifact. We measured the hyperpolarization  
 83 after the end of imaging to examine the imaging-induced activation at a steady state (Fig. 1ciii). The  
 84 activation ranged from 0 to 2.1 mV with median of 0.4 mV (Fig. 1civ), showing that our optical

85 configuration minimizes the chance of causing spurious off-target activations during single-cell  
86 stimulation or state changes of the imaged area.

87 Next, we examined the spatial resolution of our two-photon photoactivation system using two approaches.

88 First, we used whole-cell recording to examine how spiking response to a 6- $\mu\text{m}$  stimulation spot changes

89 as a function of the offset between the stimulation spot and the target (Fig. 1d). The spatial resolution of

90 stimulation based on spiking response was 6  $\mu\text{m}$  in the lateral direction and 15  $\mu\text{m}$  in the axial direction

91 ( $n=12$ ), which is on par with that of the optical confinement of the two-photon holographic illumination

92 (Supplementary Fig. 3). We then examined if it was possible to achieve single-cell stimulation of

93 hindbrain neurons using concurrent volumetric jRGECO1b imaging (Fig. 1e). We used a slice interval of

94 7  $\mu\text{m}$  which is on par with the average soma size of neurons in larval zebrafish neurons<sup>9</sup> so that we do not

95 miss collateral activation of nearby neurons (Fig. 1e i). By detecting activated cells based on online

96 regression analysis (see Methods), we tuned the stimulation power so that we stimulate only a single cell

97 (Fig. 1e ii). Out of 40 targets we examined throughout the hindbrain population (Fig. 1e iii), we were able

98 to find the power that activates just one cell in 36 cases, 9 of which activated an off-target cell presumably

99 due to imperfect soma localization of CoChR by the Kv2.1 sequence<sup>5</sup> and higher excitability and CoChR

100 expression of the off-target cell. The power required for single-cell stimulation varied from 1.2 mW to 8

101 mW with median of 3.4 mW (Fig. 1e iv). The number of activated cells increased significantly when the

102 power was set above the minimal power for single-cell stimulation (Fig. 1e v), further suggesting the

103 importance of using the minimum power for each target for precise single-cell and multi-cell activations.

104 Specifically, collateral activations observed at suprathreshold conditions showed substantial spread in the

105 axial direction (Fig. 1e vi; Kolmogorov-Smirnov test,  $P = 0.0096$ ). This is probably due to the fact that

106 higher excitation powers, approaching the saturation of the opsin response, axially enlarge the effective

107 volume of the optical stimulation, as previously discussed<sup>5</sup>. This further suggests the importance of

108 concurrent volumetric imaging with cellular z resolution to assess collateral activation (Fig. 1e i). Taken

109 together, we showed that it is possible to attain single-cell stimulation when the stimulation power was



110 carefully tuned using the combination of two-photon opsin stimulation, sparse opsin expression, and  
111 crosstalk-free volumetric functional imaging.

112 To demonstrate the utility of this system for mapping synaptic connectivity, we focused on the  
113 investigation of the connectivity from spinal V2a neurons to axial primary motoneurons (PMNs). Spinal  
114 V2a neurons are glutamatergic ipsilateral projecting neurons that play a critical role in locomotion<sup>11</sup>.  
115 Their connectivity to motoneurons has been examined with both paired whole-cell recordings and  
116 electron microscopy<sup>12-14</sup>. However, these analyses have been restricted to local connections within a few  
117 spinal segments. To examine their long-range connectivity, we patched PMNs in spinal segment 23 and  
118 stimulated single V2a neurons expressing CoChR-Kv2.1 and jRGECO1b from segment 6 to segment 21  
119 (Fig. 2a i, n = 6 fish). In 85% of the stimulation sites, we were able to achieve single-cell activation  
120 (358/419; Fig. 2a ii). Twenty seven percent of the cells we activated elicited membrane depolarization in  
121 the recorded PMNs in synchrony with the stimulation pulses (98/358; Fig. 2b i, ii). We found two distinct  
122 response types based on the kinetics of membrane depolarization that are not mutually exclusive. The first  
123 type had a fast rise time constant and was observed in response to 12% of the stimulated cells (Fig. 2b i;  
124 half rise time =  $0.57 \pm 0.35$  ms, n = 43). This time constant is compatible with those of postsynaptic  
125 potentials<sup>14</sup>, indicating they are synaptically connected to the recorded PMNs. The second type had a  
126 slower rise time constant and was observed in response to 21% of the stimulated cells (Fig. 2b ii; half rise  
127 time =  $15.3 \pm 5.4$  ms, n = 74). As motoneurons do not express CoChR in this preparation, the second  
128 type is likely to be indirect excitation through electrical coupling among axial motoneurons<sup>14-16</sup>.  
129 Coexistence of both response types were observed in 18% of the responding cell (18/98). The probability  
130 of finding synaptically connected cells was significantly biased towards the dorsal spinal cord (Fig. 2c;  $P$   
131 =  $6.5e-6$ ). The bias in the rostrocaudal direction was also significant but less prominent with some  
132 connected cells up to 15 segments rostral to the PMN (Fig. 2c;  $P = 0.015$ ). This not only confirms  
133 previous observations about the selective innervation of dorsal V2a neurons to PMNs<sup>12,13</sup> but also extends  
134 this connectivity pattern to long-range connections. The probability of finding coupled cells was

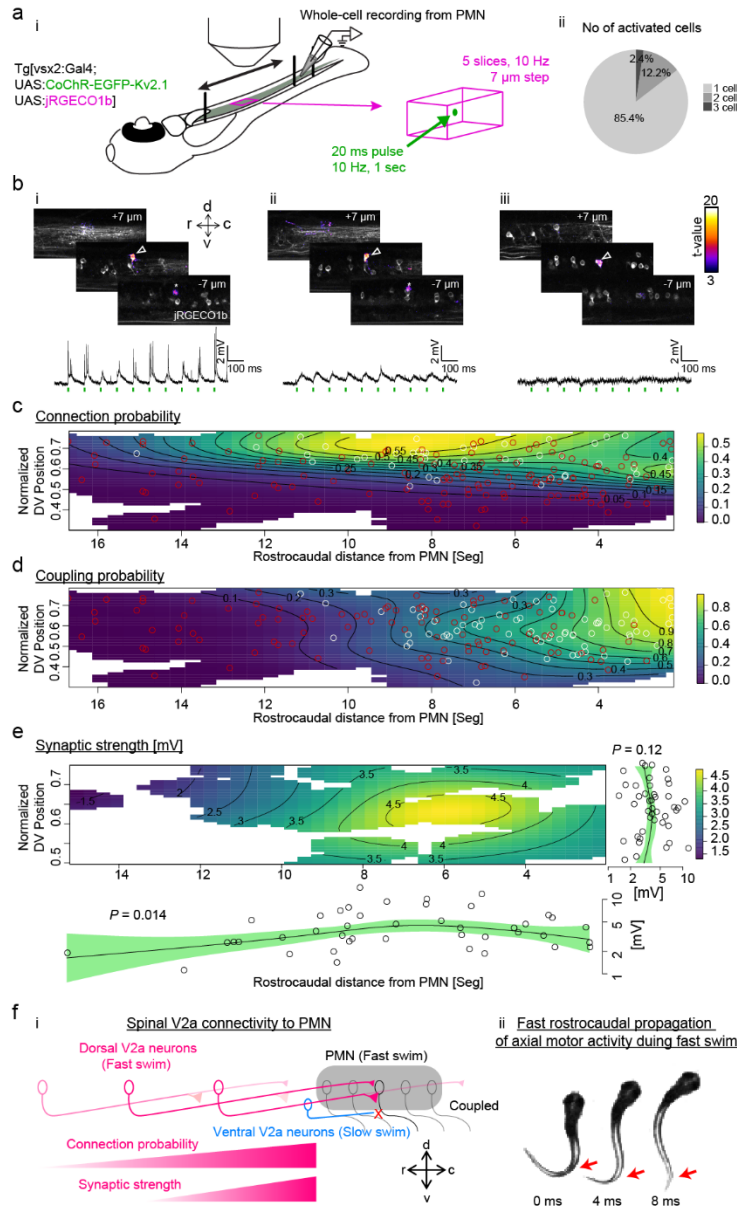

**Figure 2. Large-scale synaptic connectivity mapping from spinal V2a neurons to primary motoneurons assisted by two-photon optogenetics and imaging**

**a.** (i) Experimental procedure. Whole-cell recording was established in a primary motoneuron (PMN) in the caudal spinal cord (spinal segment 23) in the transgenic line expressing CoChR-EGFP-Kv2.1 and jRGECO1b in V2a neurons (indicated by the shaded area). Spinal V2a neurons rostral to the patched PMN were activated one-by-one by holographic two-photon stimulation. Simultaneous volumetric imaging of jRGECO1b was performed to examine the resulting activation. To cover V2a neurons up to 17 segments rostral to the patched PMN, the sample was scanned along the rostrocaudal direction. (ii) Number of activated V2a neurons per photostimulation sites ( $n = 419$  sites,  $N = 6$  fish) **b.** Examples of successful single-cell stimulation of spinal V2a neurons. (i) An example of V2a neuron activation that led to fast membrane depolarizations in a PMN. Three sagittal slices showing the activated cells (open arrowhead) and nearby neurons and neuropil. The activated pixels were detected by regression analysis and color-coded by their  $t$ -values. The target cell is indicated by an open arrow. The asterisk at the plane  $-7 \mu\text{m}$  indicates the part of the target cell. d, dorsal; v, ventral; r, rostral; c, caudal. The membrane potential from the patched PMN during the stimulation is plotted at the bottom. The individual stimulation pulses are indicated by green bars. Note the fast depolarizations triggered by stimulation pulses, indicating the stimulated V2a neuron is synaptically connected to the PMN. (ii) An example of V2a neuron activation that led to slow membrane depolarization in the PMN. This panel is similarly organized to i. Note that the stimulation pulses triggered slow depolarizations distinct from synaptic potential. (iii) An example of V2a neuron activation that led to no discernible responses in the PMN. No consistent postsynaptic potentials were observed in sync with the stimulation pulses. **c.** Spatial probability map of V2a neurons synaptically connected to PMN. The positions of the singly stimulated V2a neurons are plotted. The x-axis indicates the distance from the patched PMN in the caudal spinal cord in the unit

of segments and the y-axis indicates the dorsoventral position normalized to the full thickness of the cord at a given segment (see Methods). Synaptically connected cells are indicated by white circles and non-connected ones are indicated by red circles. The probability density was estimated by generalized additive model (see Methods) and color coded. Both dorsoventral and rostrocaudal positions showed significant effect to the connection probability (dorsoventral position,  $P = 6.5\text{e-}6$ ; rostrocaudal position,  $P = 0.015$ ). **d.** Spatial probability map of V2a neurons exhibiting putative indirect electrical coupling (slow depolarization) to PMN. This panel is similarly organized to c. White circles, coupled cells; red circles, non-coupled cells. The rostral caudal position showed significant effect ( $P = 7.5\text{e-}9$ ). **e.** Spatial distribution of the synaptic strength from the synaptically connected V2a neurons to PMN. This panel is similarly organized to c and d except that the partial effect of the dorsoventral position is plotted on the right and that of the rostrocaudal position is plotted on the bottom. Note the significant effect of rostrocaudal position. **f.** A proposed circuit motif of dorsal spinal V2a neurons involved in fast locomotion that entails fast rostrocaudal propagation of axial muscle activity. (i) PMNs are only recruited during fast swim and electrically coupled across local spinal segments (gray shade). PMNs do not receive inputs from ventral V2a neurons that are recruited during slow swim (blue) but do receive long-range inputs from dorsal V2a neurons that are recruited during fast swim (magenta). Both the connection probability and the synaptic strength decline as the distance between the dorsal V2a neurons and PMNs increases. This creates a long-range gradient of excitatory drive in the rostrocaudal direction, which is suitable for generating fast rostrocaudal propagation of axial muscle activity. (ii) Fast rostrocaudal propagation of axial muscle activity during fast swim. Consecutive images of fish during fast swim are shown with the time interval of 4 ms. The regions of the tail where the curvature changes its sign are indicated with red arrows in all images to highlight the rostrocaudal propagation of axial motor activity during fast swim.

135 significantly biased to the nearby segments with more than half of the cells within 6 segments from the  
136 recorded PMNs (Fig. 2d;  $P = 7.5e-9$ ). This is consistent with a previous report<sup>14</sup>. The distribution of  
137 synaptic strength also showed significant bias in the rostrocaudal direction with stronger connections  
138 from the closer V2a neurons (Fig. 2e;  $P = 0.014$ ). Such a rostrocaudal gradient of excitatory drive has  
139 been suggested to play an important role in the rostrocaudal propagation of axial muscle activity<sup>17,18</sup> and  
140 was also hypothesized to arise from either more abundant excitatory neurons in the rostral spinal cord<sup>18,19</sup>  
141 or their more prominent descending projections<sup>17,20</sup>. Here we provide experimental evidence for long-  
142 range rostrocaudal gradients of synaptic strength and connection probability from a class of excitatory  
143 interneurons that is selectively recruited during fast locomotion<sup>21,12</sup> (Fig. 2f i). This evidence suggests the  
144 role of this circuit motif in fast undulatory movements during rapid forward locomotion. (Fig. 2f ii).

145 In summary, we established a system that enables the efficient discovery of cellular-level circuit motifs *in*  
146 *vivo*. The combination of circuit optogenetics and concurrent volumetric  $Ca^{2+}$  imaging assures single-cell  
147 precision optical activation of putative presynaptic neurons. High temporal resolution of electrical  
148 recording of postsynaptic response enables the identification of different types of postsynaptic response  
149 based on its kinetics. Thus, this system allows single-cell precision optical mapping of presynaptic  
150 neurons and detailed characterization of synaptic dynamics on a large scale and enables efficient  
151 discovery of circuit motifs as we demonstrated here. Temporally precise multi-spot photoactivation also  
152 enables the investigation of synaptic summation. This approach, combined with rapidly improving  
153 sensitive and fast voltage indicators, can pave the way for an all-optical synaptic mapping to assess  
154 longitudinal changes in synaptic properties across many temporal scales in a living animal.

## 155 **Methods**

### 156 **Fish care**

157 Zebrafish larvae were obtained from an in-house breeding colony of adults maintained at 28.5°C on a 14-  
158 10 hr light-dark cycle. Embryos were raised in a separate incubator but at the same temperature and on  
159 the same light-dark cycle. Larvae at 5 or 6 days old post-fertilization were used for this study. All  
160 experiments presented in this study were conducted in accordance with the animal research guidelines  
161 from the National Institutes of Health and were approved by the Institutional Animal Care and Use  
162 Committee and Institutional Biosafety Committee of Janelia Research Campus (16-145).

### 163 **Transgenic fish**

164 The following previously published transgenic lines were used in this study: TgBAC(vsx2:Gal4)<sup>22</sup>;  
165 Tg(10xUAS:CoChR-EGFP)<sup>jf44 8</sup>; Tg(elavl3:Gal4)<sup>23</sup>. Tg(10xUAS:CoChR-EGFP-Kv2.1) and  
166 Tg(10xUAS:jRGECO1b) were generated with the Tol2 system (Urasaki, Morvan, and Kawakami 2006)  
167 using the corresponding plasmids prepared from the following reagents.

- 168 1. Tol2kit<sup>24</sup>
- 169 2. FCK-gene86-GFP (CoChR)<sup>6</sup>
- 170 3. pTol2-elavl3-Voltron-ST(Kv2.1)<sup>25</sup>
- 171 4. pTol2-elavl3-jRGECO1b<sup>8</sup>

### 172 **Optics**

173 Two-photon computer generated holography and remote-focusing systems were built on top of a custom  
174 microscope equipped with a two-photon resonant scanning system and a one-photon widefield  
175 epifluorescence system as described previously<sup>25,26</sup>. Briefly, a resonant scanner (Thorlabs, MPM-2PKIT)  
176 was used to scan the femtosecond laser (MKS Instruments, Mai Tai HP Deep See and Insight Deep See,

177 MA) through a scan lens assembly consisting of three achromatic lenses (Thorlabs, AC254-150-C,  
178 AC508-200-B and AC508-200-B), a tube lens (Nikon, MXA22018) and a 25x objective lens (Leica,  
179 HCX IRAPO L 25x/0.95 W, Germany). Excited fluorescence by two-photon scanning was directed to  
180 GaAsP photomultiplier tubes (Hamamatsu, H10770-40 SEL) by a dichroic mirror (Semrock, FF735-  
181 Di02) and spectrally separated to three channels by dichroic mirrors (Semrock, FF562-Di03 and FF650-  
182 Di01) and emission filters (Semrock, FF01-520/70-30-D, FF01-625/90, and FF01-731/137). Two-photon  
183 images were collected using ScanImage (Vidrio Technologies, VA). Epi-fluorescence for widefield  
184 imaging was directed to the path by an image-splitting dichroic mirror (Semrock, F640-FDi02-t3) and  
185 filtered by an IR filter (Semrock, FF01-750sp) and an appropriate emission filter, and then images were  
186 formed on the camera (PCO, pco.edge 4.2, Germany) through a tube lens (Nikon, MXA22018). Images  
187 were collected using  $\mu$ Manager (<https://micro-manager.org/>). The initial dichroic mirror for each path is  
188 on a miniature stage to switch between the two detection pathways.

## 189 **Computer generated holography system**

190 Two-photon illumination patterns were obtained with computer-generated holography, a technique based  
191 on the phase modulation of the laser wavefront by the use of a spatial light modulator (SLM)<sup>5</sup>. The beam  
192 from a femtosecond laser (MKS instruments, Mai Tai HP, Deep See, MA) was enlarged by a telescope  
193 and reflected off the SLM (Hamamatsu, LCOS-SLM X10468-07) and then projected on the back focal  
194 plane of the objective lens with a double afocal telescope ( $f = 30$  mm, Thorlabs AC254-030-B;  
195  $f = 100$  mm, Thorlabs AC508-100-B;  $f = 200$  mm, Thorlabs AC508-200-B;  $f = 300$  mm, Thorlabs AC508-  
196 300-B). The zeroth order of diffraction was eliminated by introducing a single cylindrical lens (Thorlabs,  
197 LJ1516L1)<sup>27</sup>. The photoactivation beam were directed to the objective lens through a dichroic mirror  
198 (Semrock, Di02-R1064). A phase profile for a given illumination pattern was calculated using the  
199 Gerchberg and Saxton (GS) iterative algorithm<sup>28,29</sup>, implemented on a custom-designed software (Wave  
200 Front Designer). Lens-phase modulations were added to 2D-phase holograms to enable remote axial  
201 displacement and 3D positioning of 2D light patterns. The performance of the illumination system for

202 single cell photostimulation was assessed by the reconstruction of the illumination volumes  
203 corresponding to circular holographic patterns (diameter: 3  $\mu\text{m}$ , 6  $\mu\text{m}$  and 12  $\mu\text{m}$ ) (Supplementary Fig. 3).  
204 A thin layer of rhodamine-6G (spin coated and dried on a glass coverslip) was positioned at the focal  
205 plane of the objective lens and then a disk illumination pattern was scanned axially by the lens-phase  
206 modulation and the resulting fluorescence was imaged by the widefield epifluorescence imaging setup  
207 described above (Supplementary Fig. 3a). The fluorescence signal was integrated over the spot surface  
208 and plotted as a function of the axial position specified by the lens-phase modulation (Supplementary Fig.  
209 3c). The validation of the effective axial shift induced by the nominal digital phase-modulation was  
210 verified in a dual microscope configuration by a mechanical axial scan of the objective lens, as previously  
211 described<sup>27,5</sup>.

212 The holographic illumination system was calibrated before each experiment by verifying the spatial  
213 alignment between the patterns of illumination and the imaging system. We generated a bi-dimensional  
214 multi-spot holographic pattern (typically 5 diffraction limited spots) and we used it to bleach a thick  
215 fluorescence plate (Chroma, part No. 92001). The pattern was axially shifted by a lens-phase modulation  
216 in order to bleach the fluorescent plate at different depths (typically five planes over  $\sim 200$   $\mu\text{m}$  along the z  
217 axis). Then we re-imaged the bleached pattern with the two-photon scanning imaging system to obtain the  
218 exact positioning of the holographic spots in the coordinates of the imaging system. An affine  
219 transformation (x-y-z stretch, translation and rotation) between the nominal and the measured position of  
220 the spots was identified for each plane. The parameters of such transformation were linearly interpolated  
221 to obtain the required transformation matrix at any depth.

222 After such calibrations, we examined the targeting accuracy by bleaching the fluorescent plate with an  
223 arbitrary multi-point 3D illumination patterns (Supplementary Fig. 5), ensuring micrometric precision in  
224 the control of the spot locations.

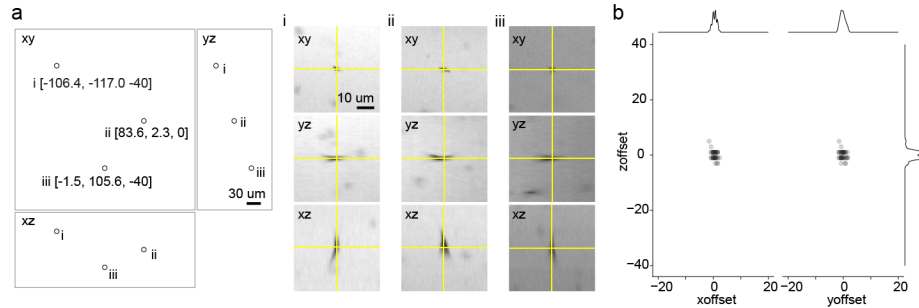

**Supplementary Figure 5. Accuracy of 3D targeting *in vitro* tested by bleaching fluorescent plate**

**a.** Examples of bleached spots. (left) Location of three bleached spots in xy, yz, and xz views. (right) Close-up views of bleached spots. **b.** The location of bleached spots relative to the target location (n = 42 targets).

225

## 226 Remote-focusing system

227 An axial scanning system for two-photon imaging was implemented based on a remote movable mirror  
228 that is conjugate to the specimen plane and translated by a voice coil motor similar to the system  
229 described previously<sup>10</sup> (Figure 1a iii). This system is built on top of the existing two-photon imaging  
230 system in a way that can be engaged on demand using the polarizing beam splitters (Thorlabs, PBS203)  
231 mounted on a sliding stage. When the beam is directed to the system, it goes through a telescope (f1 = 75  
232 mm Thorlabs AC254-075-C, f2 = 125 mm Thorlabs AC254-125-C) and an axial scan lens assembly  
233 consisting of three achromats lenses (Thorlabs AC254-100-C, AC254-75-C and AC254-100-C) before  
234 being reflected by the axial scan mirror (Thorlabs, PF03-03-P01) mounted on a voice coil (equipment  
235 solutions, LFA-2004). A quarter-wave plate (Thorlabs, AQWP05M-980) was inserted in the path close to  
236 the polarizing beam splitter so that the beam reflected by the mirror goes past the polarizing beam splitter  
237 and to the xy-scanning module. Basic optical performance was assessed by measuring the point spread  
238 function (Supplementary Fig. 4). We chose 6 mirror positions and in each position we took a z-stack of a  
239 two-photon excitable target by moving the objective lens by a piezo objective scanner (PI, P-725K129,  
240 Germany) with a 0.5 μm step size (Supplementary Fig. 4a). The signal profile was plotted as a function of  
241 the position of the objective lens for each mirror position (Supplementary Fig. 4b). Then the full width at

242 half maximum for each mirror position was plotted as a function of the focus position (Supplementary  
243 Fig. 4c).

## 244 **Assessment of the imaging-induced artifact by simultaneous perforated patch** 245 **recording and Ca<sup>2+</sup> imaging from holographically stimulated neurons**

246 Perforated patch recordings were made in hindbrain neurons expressing CoChR-EGFP-Kv2.1 and  
247 jRGECO1b in Tg[vsx2:Gal4;10xUAS:CoChR-EGFP-Kv2.1;10xUAS:jRGECO1b] using the procedure  
248 described previously with some modifications<sup>26</sup>. Briefly, five-day-old fish were paralyzed by 1 mg/ml  
249 alpha-bungarotoxin (MilliporeSigma, 203980, MO) dissolved in system water and then anesthetized with  
250 MS-222 and secured with etched tungsten pins through the notochord to a glass-bottom dish coated with  
251 Sylgard (Dow Corning, Sylgard 184, MA). Then the solution was exchanged with extracellular solution  
252 containing MS-222 (134 mM NaCl, 2.9 mM KCl, 1.2 mM MgCl<sub>2</sub>, 2.1 mM CaCl<sub>2</sub>, 10 mM HEPES, 10  
253 mM glucose, 0.3 mM MS-222, adjusted to pH 7.8 with NaOH). Then the ventral surface of the hindbrain  
254 was carefully exposed using a tungsten pin and fine forceps and the solution was exchanged to  
255 extracellular solution without MS-222. Ventral neurons in the middle hindbrain (hindbrain segment 3, 4  
256 and 5) were targeted based on fluorescence and scanned Dodt gradient contrast image acquired with the  
257 custom two-photon microscope. Nystatin-based perforated whole-cell recordings were established using  
258 the procedure described previously. Briefly, nystatin-containing intracellular solution was freshly  
259 prepared from 50  $\mu$ L intracellular solution (125 mM K-gluconate, 2.5 mM MgCl<sub>2</sub>, 10 mM EGTA, 10  
260 mM HEPES and 4 mM Na<sub>2</sub>ATP adjusted to pH 7.3 with KOH) and 250 nL nystatin stock solution (100  
261 mg/mL in DMSO) and filtered by 0.45  $\mu$ m nanopore filter (Ultra free MC 0.45 $\mu$ m). Then a glass pipette  
262 with the resistance of 7-10 M $\Omega$  was front-filled with 2  $\mu$ L intracellular solution and then backfilled with  
263 14  $\mu$ L nystatin-containing intracellular solution. After quickly forming a G $\Omega$  seal with the target cell, we  
264 waited until the access resistance became lower than 100 M $\Omega$ . Then, the membrane potential was  
265 recorded in current-clamp mode with EPC10 Quadro amplifier (HEKA Elektronik, Germany) using



266 PatchMaster software (HEKA Elektronik, Germany) while simultaneously delivering a train of  
267 holographic stimulation (6  $\mu\text{m}$  circular pattern, 950 nm, 10 pulses of 20-ms duration delivered at 40 Hz)  
268 and recording  $\text{Ca}^{2+}$  response with two-photon jRGECO1b imaging (1140 nm, 6.5 mW, 30 Hz). Imaging  
269 power was set to ensure  $\text{Ca}^{2+}$  response was reliably detected. Only the cells that showed reliable firing in  
270 response to the holographic stimulation were included in the analysis of imaging-induced depolarization.  
271 The amount of depolarization by the imaging laser was quantified by calculating the difference in the  
272 average membrane potential from the three-second window before the end of the imaging and that from  
273 three-second window after the end of the imaging (10 trials).

## 274 **Characterization of wavelength-dependent two-photon activation of CoChR**

275 Current-clamp recording was performed from hindbrain neurons expressing CoChR-EGFP-Kv2.1 in  
276 Tg[vsx2:Gal4; 10xUAS:CoChR-EGFP-Kv2.1] using the procedure described above but in a standard  
277 whole-cell configuration. The patched cell was stimulated by scanning femtosecond laser with resonant-  
278 galvo mirrors (6  $\mu\text{m}$  x 6  $\mu\text{m}$ , 2 ms duration) using two femtosecond laser sources to cover from 780 nm to  
279 1220 nm in 40 nm steps (780- 980: MaiTai HP; 1020-1220: Insight HP). The power after the objective  
280 lens was matched to 10 mW across wavelengths so that the none of the cells spiked an action potential  
281 across all the wavelengths examined. The pulse width at each wavelength was measured with auto-  
282 correlator (FEMTOCHROME Research, Inc., FR-103TPM/700). The resulting membrane depolarization  
283 to the most effective wavelength for a given cell was averaged from at least 5 trials and then used to  
284 normalize the response amplitude in individual trials. This normalized response was averaged over all the  
285 trials pooled across cells. The resulting action spectrum is similar to published recordings<sup>5</sup>, that here we  
286 extend to a broader wavelength range.

287

## 288 **Characterization of jRGECO1b in zebrafish sensory neurons**

289 The sensitivity of jRGECO1b in zebrafish sensory neurons was examined as described previously<sup>30</sup>.  
290 Briefly, Tg[elavl3:Gal4;10xUAS:jRGECO1b] at 3 dpf were paralyzed by a 5-min bath application of 1  
291 mg/ml  $\alpha$ -bungarotoxin (Sigma, 203980). Larvae were mounted on their side in a field stimulation  
292 chamber (Warner, RC-27NE2) with 1.5% low-melting-point agarose (Supplementary Fig. 2b). Tactile  
293 sensory neurons (Rohon-Beard cells) were identified based on their oblong-shaped soma in the dorsal  
294 spinal cord and their innervations to the skin using the two-photon microscope described above.  
295 Functional images (256 × 256 pixels) were acquired at 7.5 Hz (1140 nm, 3 mW) while trains of 1, 2, 5,  
296 10, and 20 field stimuli (1 ms pulse width at 50 Hz) were applied with a stimulator (NPI ISO-STIM) to  
297 stimulate the processes of the sensory neurons on the skin. This protocol elicits the corresponding number  
298 of spikes in the sensory neurons<sup>30</sup>. The stimulation voltage was calibrated to elicit an identifiable response  
299 to a single pulse in Rohon-Beard cells without stimulating muscle cells. Regions of interest were selected  
300 manually, and data were analyzed using MATLAB (MathWorks). Two-photon absorption spectra of  
301 jRGECO1b were collected by John Macklin as previously described<sup>31</sup> (Supplementary Fig. 2a).

## 302 **Concurrent two-photon optogenetics and volumetric imaging**

303 Tg[vsx2:Gal4;10xUAS:CoChR-EGFP-Kv2.1;10xUAS:jRGECO1b] at 120-132 hpf were used for this  
304 experiment. The fish with high expression of CoChR-EGFP-Kv2.1 and jRGECO1b were selected,  
305 paralyzed with  $\alpha$ -bungarotoxin (MilliporeSigma, 203980, MO), and then embedded in 1.6% low-melting  
306 point agar. Each sample was left under the objective lens at least 40 minutes before starting the  
307 experiment to minimize potential sample drifts during the experiment. A reference z-stack for jRGECO1b  
308 was acquired (1140 nm, 512 x 512 x 100 slices, 0.76 x 0.76 x 2  $\mu$ m). Then a single target cell was  
309 selected for each stimulation session. A phase pattern for stimulating each target with a 6- $\mu$ m diameter  
310 disk pattern was calculated, taking into account the transformation matrix obtained in the calibration  
311 described above. A train of ten 20 ms stimulation pulses was delivered at 10 Hz while monitoring Ca<sup>2+</sup>

312 response by volumetric imaging of jRGECO1b using the remote-focusing system (1140 nm, 512x256, 9  
313 planes, 7  $\mu\text{m}$  z step, 6 Hz, 6.5 mW) from 5 s before the stimulation to 14 s after the stimulation. To  
314 identify neurons stimulated by this protocol during the experiments, we performed regression analysis as  
315 described previously<sup>26</sup>. Briefly, two-photon data was first corrected for mismatch between the odd and  
316 even scan lines by cross correlation and then the xy movements were corrected for each slice by cross  
317 correlation if necessary. A regressor for stimulation-induced activity was constructed by convolving the  
318 stimulation pulses with a jRGECO1b impulse response function modeled as the rise and decay  
319 exponentials (0.5 s rise and 2 s decay) and then standardized. The standardized coefficient was estimated  
320 by ordinary least square and then  $T$  value for each pixel was calculated based on standardized coefficient  
321 and residual. The activation map was used to determine the soma position of all the activated cells and  
322 their distances to the intended targets were calculated using the transform from the remote-focusing  
323 imaging space to the standard imaging space as described above. We repeated this procedure with  
324 stimulation powers ranging from 1.2 mW to 12 mW to find the condition where only one cell is activated  
325 for each stimulation target.  $\Delta F/F_0$  was calculated by defining the baseline fluorescence ( $F_0$ ) as the  
326 average fluorescence during the 4-s time window before the stimulation.

## 327 **Synaptic connectivity mapping of spinal V2a neurons to spinal motoneurons**

328 Whole-cell recordings from spinal primary motoneurons were performed from  
329 Tg[vsx2:Gal4;10xUAS:CoChR-EGFP-Kv2.1;10xUAS:jRGECO1b] at 120-132 hpf using the procedure  
330 described previously<sup>26</sup>. Briefly, the fish with high expression of CoChR-EGFP-Kv2.1 and jRGECO1b  
331 were selected, paralyzed with  $\alpha$ -bungarotoxin, and pinned to a sylgard-coated dish with etched tungsten  
332 pins. The spinal cord at muscle segment 23 was exposed by removing the muscles overlying the spinal  
333 cord. A pipette was filled with the standard intracellular solution containing 0.01% of Alcea Fluor 647  
334 hydrazide (Thermo Fisher Scientific) and a class of primary motoneurons, caudal primary motoneuron  
335 (CaP), was targeted based on its large soma and proximity to the segmental boundary and the lateral

336 surface of the spinal cord. The stimulations of putative presynaptic spinal V2a neurons started 10 minutes  
337 after forming a gigaohm seal so that the fluorescence of Alexa Fluor 647 does not leak to the red channel  
338 used for jRGECO1b imaging. Single spinal V2a neurons were targeted by a 6  $\mu\text{m}$ -diameter disk  
339 illumination pattern. Ten 20-ms stimulation pulses were delivered at a 100-ms interval so that  
340 postsynaptic potentials induced by each pulse can be separated temporally.  $\text{Ca}^{2+}$  responses of neighboring  
341 V2a neurons were monitored by jRGECO1b imaging with the remote focusing system (512x256, 5  
342 planes, 7  $\mu\text{m}$  step, 10 Hz). The stimulation session was continued until the patched CaP neuron started to  
343 depolarize more than 5 mV after establishing the whole-cell configuration. Then a series of z-stacks for  
344 CoChR-EGFP-Kv2.1, jRGECO1b and Alexa Fluor 647 was acquired in the standard two-photon imaging  
345 configuration from muscle segments 4 to 23.

346 The regression analysis was performed to detect all the cells activated by the stimulation using the  
347 procedure mentioned above but with one modification. To isolate the stimulation induced  $\text{Ca}^{2+}$  response  
348 from the  $\text{Ca}^{2+}$  response during spontaneous swimming, an additional regressor for spontaneous swimming  
349 was constructed based on the slow subthreshold depolarization of PMNs observed during spontaneous  
350 swimming<sup>21</sup>. Such depolarization was detected by a bandpass filter and then the regressor was constructed  
351 by convolving a boxcar function representing the duration of swim with the jRGECO1b impulse response  
352 function described above. The trials with more than one activated cells were excluded from further  
353 analysis. Among the stimulation trials with only one activated cell, we detect postsynaptic potentials that  
354 occurred within 20 ms from the onset of each stimulation pulse based on the spiking pattern we observed  
355 in hindbrain neurons using the identical stimulation protocol. If such postsynaptic potentials occurred in  
356 more than 5 stimulation pulses for a given activated cell and their rise times matched the rise times of  
357 synaptic potentials<sup>14</sup>, the cell was considered to have synaptic connection to the patched motoneuron (half  
358 rise time =  $0.57 \pm 0.35$  ms,  $n = 43$ ). In some cases, slow depolarization with a much longer rise time was  
359 observed consistently after the stimulation pulses (half rise time =  $15.3 \pm 5.4$  ms,  $n = 74$ ). Such slow  
360 membrane depolarization eliciting input to primary motoneurons was previously characterized and

361 suggested to be caused by electrical coupling through neighboring motoneurons<sup>14</sup>. Thus, the cells that  
362 produced such slow response in motoneurons were categorized as electrically coupled cells. To  
363 reconstruct the position of each activated cell, a series of z-stacks was stitched with the stitching plugin  
364 available through Fiji (<https://fiji.sc/>). The activated cell for each stimulation trial was identified in this  
365 stitched z-stack based on the xy position of the stage and the z position of the objective lens for each trial,  
366 and further confirmed by manual inspection. In order to pool data from multiple fish, the positions of the  
367 activated cells were transformed to a common space using a procedure similar to the one described  
368 previously<sup>21</sup>. First, for a given rostrocaudal position, the midline was identified based on the presence of  
369 central canal in Dodt gradient contrast image, and the dorsal edge and ventral edge of the spinal cord were  
370 marked using segmented lines in Fiji. This procedure was repeated to define the dorsal and ventral edges  
371 of the spinal cord from muscle segments 4 to 23. Then the distances from a given activated cell to the  
372 nearest line segments for the dorsal and the ventral edge were calculated. Then the dorsoventral position  
373 of a given activated cell was defined as  $Distance_{ventral}/(Distance_{dorsal} + Distance_{ventral})$ . To define the  
374 rostro-caudal position within each segment, muscle segment boundaries were marked with single-segment  
375 lines in Fiji. Then a line was extended from a given activated cell to the nearest segmental boundaries so  
376 that the vector of this line is the vector sum of the nearest dorsal and ventral edges. Then the normalized  
377 rostro-caudal position of a given activated cell within a segment was defined as  
378  $Distance_{caudal}/(Distance_{rostral} + Distance_{caudal})$ . The rostral caudal position of a given activated cell  
379 relative to the patched CaP was defined as the sum of this normalized rostro-caudal position within a  
380 segment and number of segments from the caudal end of the muscle segment where the recorded CaP was  
381 located to the caudal end of the segment where a given activated cell was located. Then the two  
382 dimensional distributions of synaptic connection probability, coupling probability and synaptic strength  
383 were modeled with generalized additive models using the *mgcv* package ([https://cran.r-](https://cran.r-project.org/web/packages/mgcv/)  
384 [project.org/web/packages/mgcv/](https://cran.r-project.org/web/packages/mgcv/)) in R (<https://www.r-project.org/>). This statistical technique is widely  
385 used to model spatial data in ecology and epidemiology<sup>32</sup>. Probability distributions were modeled as a  
386 combination of a full tensor product smooth (*te*) of the normalized dorsoventral position, a full tensor

387 product smooth ( $te$ ) of the rostrocaudal position, and a tensor product interaction ( $ti$ ) of the normalized  
388 dorsoventral position and the rostrocaudal position with a logit link function for binomial distribution.  
389 Synaptic strength was modeled similarly but with log transformed to satisfy the assumptions of the linear  
390 model (normality, homogeneity of variance, independence and linearity). The tensor product interaction  
391 was discarded to improve the concurvity of the model<sup>32</sup> (the worst case for the full model: 0.99; the worst  
392 case for the model without the tensor product interaction: 0.38).

## 393 **Acknowledgements**

394 We thank A. Pujala and M. Tanimoto for critical feedback and helpful comments on the manuscript; J.  
395 Macklin and GENIE project for providing two-photon absorption spectra of jRGECO1b; V. de Sars for  
396 the development of the Wave Front Designer software for holographic phasemask calculation; V.  
397 Goncharov for help with our optical system. This work was supported by Howard Hughes Medical  
398 Institute, the National Institute of Health (Grant NIH 1UF1NS107574 - 01), the Fondation Bettencourt  
399 Schueller (Prix Coups d'élan pour la recherche française) and the Getty Lab.

400 **Competing interests**

401 None.



## 402 **References**

- 403 1. Petreanu, L., Huber, D., Sobczyk, A. & Svoboda, K. Channelrhodopsin-2–assisted circuit mapping of  
404 long-range callosal projections. *Nat. Neurosci.* **10**, 663–668 (2007).
- 405 2. Chen, I.-W., Papagiakoumou, E. & Emiliani, V. Towards circuit optogenetics. *Curr. Opin.*  
406 *Neurobiol.* **50**, 179–189 (2018).
- 407 3. Baker, C. A., Elyada, Y. M., Parra, A. & Bolton, M. M. Cellular resolution circuit mapping with  
408 temporal-focused excitation of soma-targeted channelrhodopsin. *eLife* **5**, e14193 (2016).
- 409 4. Pégard, N. C. *et al.* Three-dimensional scanless holographic optogenetics with temporal focusing  
410 (3D-SHOT). *Nat. Commun.* **8**, 1228 (2017).
- 411 5. Shemesh, O. A. *et al.* Temporally precise single-cell-resolution optogenetics. *Nat. Neurosci.* **20**,  
412 1796–1806 (2017).
- 413 6. Klapoetke, N. C. *et al.* Independent optical excitation of distinct neural populations. *Nat. Methods* **11**,  
414 338–346 (2014).
- 415 7. Chen, I.-W. *et al.* In Vivo Submillisecond Two-Photon Optogenetics with Temporally Focused  
416 Patterned Light. *J. Neurosci.* **39**, 3484–3497 (2019).
- 417 8. Mu, Y. *et al.* Glia Accumulate Evidence that Actions Are Futile and Suppress Unsuccessful  
418 Behavior. *Cell* **178**, 27-43.e19 (2019).
- 419 9. Ahrens, M. B., Orger, M. B., Robson, D. N., Li, J. M. & Keller, P. J. Whole-brain functional imaging  
420 at cellular resolution using light-sheet microscopy. *Nat. Methods* **10**, 413–420 (2013).
- 421 10. Rupprecht, P., Prendergast, A., Wyart, C. & Friedrich, R. W. Remote z-scanning with a macroscopic  
422 voice coil motor for fast 3D multiphoton laser scanning microscopy. *Biomed. Opt. Express* **7**, 1656–  
423 1671 (2016).
- 424 11. Goulding, M. Circuits controlling vertebrate locomotion: moving in a new direction. *Nat Rev*  
425 *Neurosci* **10**, 507–518 (2009).

- 426 12. Ampatzis, K., Song, J., Ausborn, J. & El Manira, A. Separate Microcircuit Modules of Distinct V2a  
427 Interneurons and Motoneurons Control the Speed of Locomotion. *Neuron* **83**, 934–943 (2014).
- 428 13. Svava, F. N., Kornfeld, J., Denk, W. & Bollmann, J. H. Volume EM Reconstruction of Spinal Cord  
429 Reveals Wiring Specificity in Speed-Related Motor Circuits. *Cell Rep.* **23**, 2942–2954 (2018).
- 430 14. Menelaou, E. & McLean, D. L. Hierarchical control of locomotion by distinct types of spinal V2a  
431 interneurons in zebrafish. *Nat. Commun.* **10**, 1–12 (2019).
- 432 15. Fulton, B. P., Miledi, R. & Takahashi, T. Electrical synapses between motoneurons in the spinal cord  
433 of the newborn rat. *Proc. R. Soc. Lond. B Biol. Sci.* **208**, 115–120 (1980).
- 434 16. Perrins, R. & Roberts, A. Cholinergic and electrical synapses between synergistic spinal  
435 motoneurons in the *Xenopus laevis* embryo. *J. Physiol.* **485 ( Pt 1)**, 135–144 (1995).
- 436 17. Kotaleski, J. H., Grillner, S. & Lansner, A. Neural mechanisms potentially contributing to the  
437 intersegmental phase lag in lamprey. *Biol. Cybern.* **81**, 317–330 (1999).
- 438 18. Wolf, E., Soffe, S. R. & Roberts, A. Longitudinal neuronal organization and coordination in a simple  
439 vertebrate: a continuous, semi-quantitative computer model of the central pattern generator for  
440 swimming in young frog tadpoles. *J. Comput. Neurosci.* **27**, 291–308 (2009).
- 441 19. Hartenstein, V. Early pattern of neuronal differentiation in the *Xenopus* embryonic brainstem and  
442 spinal cord. *J. Comp. Neurol.* **328**, 213–231 (1993).
- 443 20. Dale, N. Excitatory synaptic drive for swimming mediated by amino acid receptors in the lamprey. *J.*  
444 *Neurosci.* **6**, 2662–2675 (1986).
- 445 21. McLean, D. L., Masino, M. A., Koh, I. Y. Y., Lindquist, W. B. & Fetcho, J. R. Continuous shifts in  
446 the active set of spinal interneurons during changes in locomotor speed. *Nat. Neurosci.* **11**, 1419–  
447 1429 (2008).
- 448 22. Kimura, Y. *et al.* Hindbrain V2a Neurons in the Excitation of Spinal Locomotor Circuits during  
449 Zebrafish Swimming. *Curr. Biol.* **23**, 843–849 (2013).
- 450 23. Kimura, Y., Satou, C. & Higashijima, S. V2a and V2b neurons are generated by the final divisions of  
451 pair-producing progenitors in the zebrafish spinal cord. *Development* **135**, 3001–3005 (2008).

- 452 24. Kwan, K. M. *et al.* The Tol2kit: A multisite gateway-based construction kit for Tol2 transposon  
453 transgenesis constructs. *Dev. Dyn.* **236**, 3088–3099 (2007).
- 454 25. Abdelfattah, A. S. *et al.* Bright and photostable chemigenetic indicators for extended in vivo voltage  
455 imaging. *Science* **365**, 699–704 (2019).
- 456 26. Pujala, A. & Koyama, M. Chronology-based architecture of descending circuits that underlie the  
457 development of locomotor repertoire after birth. *eLife* **8**, e42135 (2019).
- 458 27. Hernandez, O. *et al.* Three-dimensional spatiotemporal focusing of holographic patterns. *Nat.*  
459 *Commun.* **7**, 11928 (2016).
- 460 28. Gerchberg, R. W. & Saxton, W. O. A practical algorithm for the determination of phase from image  
461 and diffraction plane pictures. *Optik* **35**, 237 (1972).
- 462 29. Lutz, C. *et al.* Holographic photolysis of caged neurotransmitters. *Nat. Methods* **5**, 821–827 (2008).
- 463 30. Higashijima, S., Masino, M. A., Mandel, G. & Fetcho, J. R. Imaging Neuronal Activity During  
464 Zebrafish Behavior With a Genetically Encoded Calcium Indicator. *J. Neurophysiol.* **90**, 3986–3997  
465 (2003).
- 466 31. Dana, H. *et al.* Sensitive red protein calcium indicators for imaging neural activity. *eLife* **5**, e12727  
467 (2016).
- 468 32. Wood, S. N. *Generalized Additive Models: An Introduction with R, Second Edition.* (Chapman and  
469 Hall/CRC, 2017).
- 470
